# Supplementary material for: Robust scoring of selective drug responses for patient-tailored therapy selection
Source: Springer Nature journal article supplement (doi:10.1038/s41596-023-00903-x), 2023-11-23
Supplement: MOESM1 [file 41596_2023_903_MOESM1_ESM10.pdf]

# Robust scoring of selective drug responses for patient-tailored therapy selection

In the format provided by the  
authors and unedited

## Supplementary Information for

### Robust scoring of selective drug responses for patient-tailored therapy selection

Yingjia Chen, Liye He, Aleksandr Ianevski, Pilar Ayuda-Durán, Swapnil Potdar, Jani Saarela, Juho J. Miettinen, Sari Kytölä, Susanna Miettinen, Mikko Manninen, Caroline A. Heckman, Jorrit M. Enserink, Krister Wennerberg and Tero Aittokallio

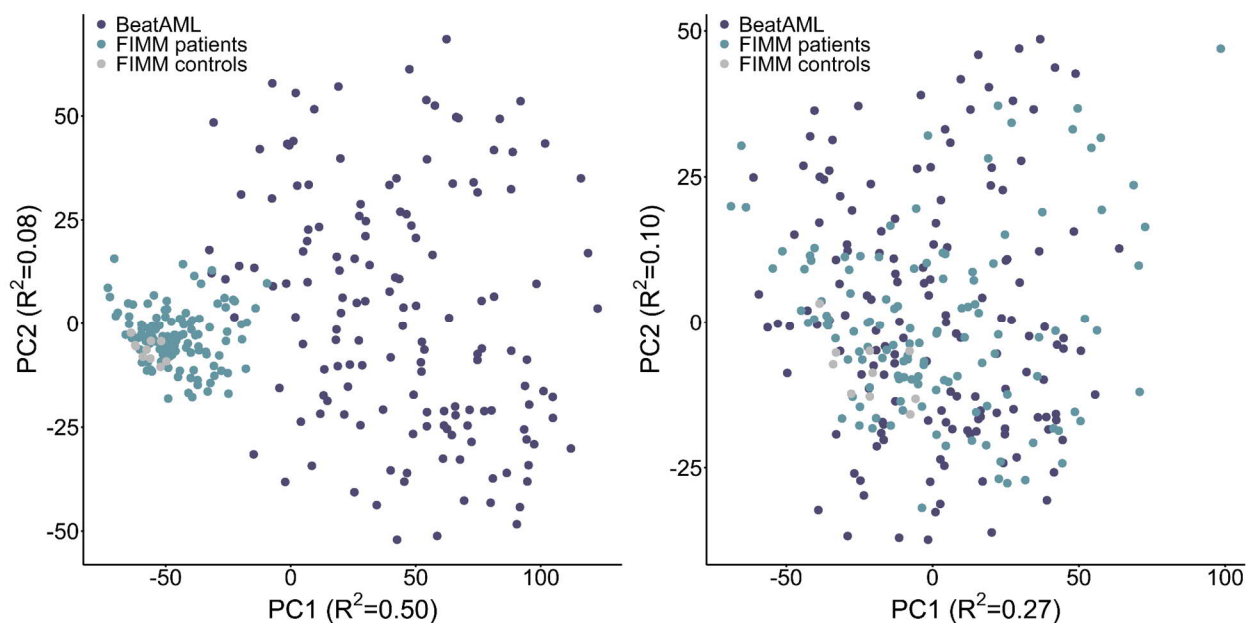

**Supplementary Figure 1 |** Batch effect correction when combining drug response data from BeatAML patients ( $n = 147$ ), FIMM-AML patients ( $n=79$  for FO4B compound collection;  $n=46$  for FO5A collection), and FIMM healthy control samples ( $n = 10$ , FO5A compound collection). Probabilistic principal component analysis (PPCA) was used, since the BeatAML and FIMM-AML drug response profiles contain missing values (5.29%). *Left panel:* PPCA of non-selective DSS profiles, showing batch effects between the FIMM and BeatAML patients. *Right panel:* PPCA of ComBat-corrected DSS profiles, where the batch variable was sample source (BeatAML samples vs. FIMM patients/controls; see **Procedure 2** for details). The coefficient of determination ( $R^2$ ) shows the proportion of variance explained by each PC.

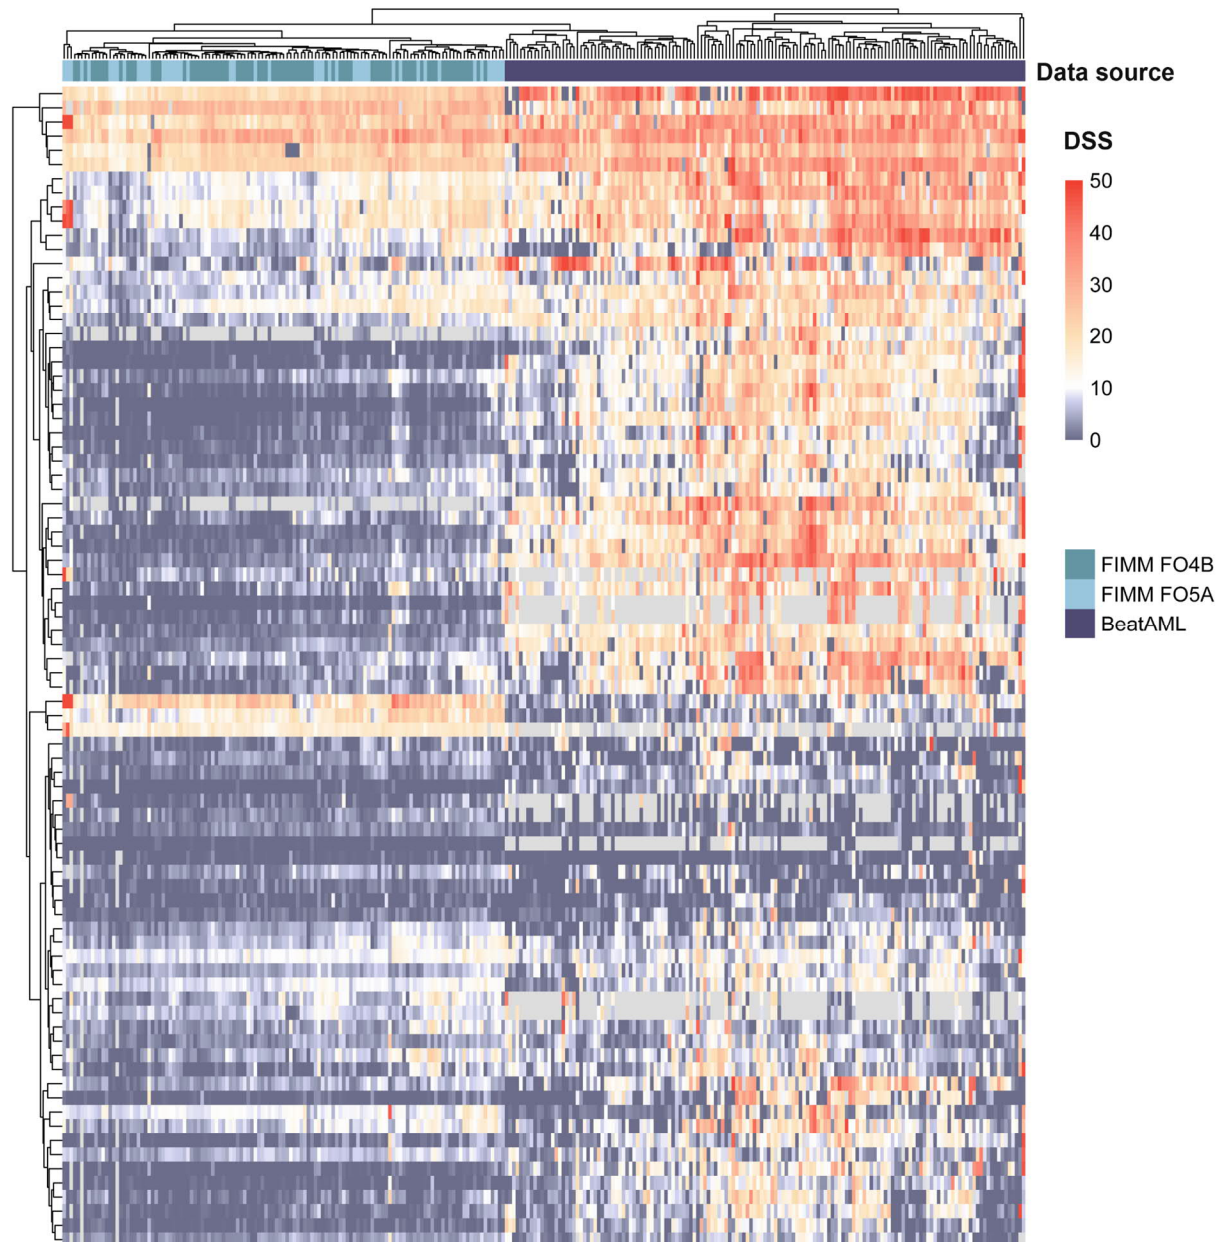

**Supplementary Figure 2** | Integrated heatmap of non-selective DSS drug responses for the BeatAML and FIMM-AML cohorts. Columns correspond to 272 patients (147 from BeatAML and 125 from FIMM-AML; n=79 for FO4B compound collection; n=46 for FO5A collection), and rows are 82 overlapping drugs.

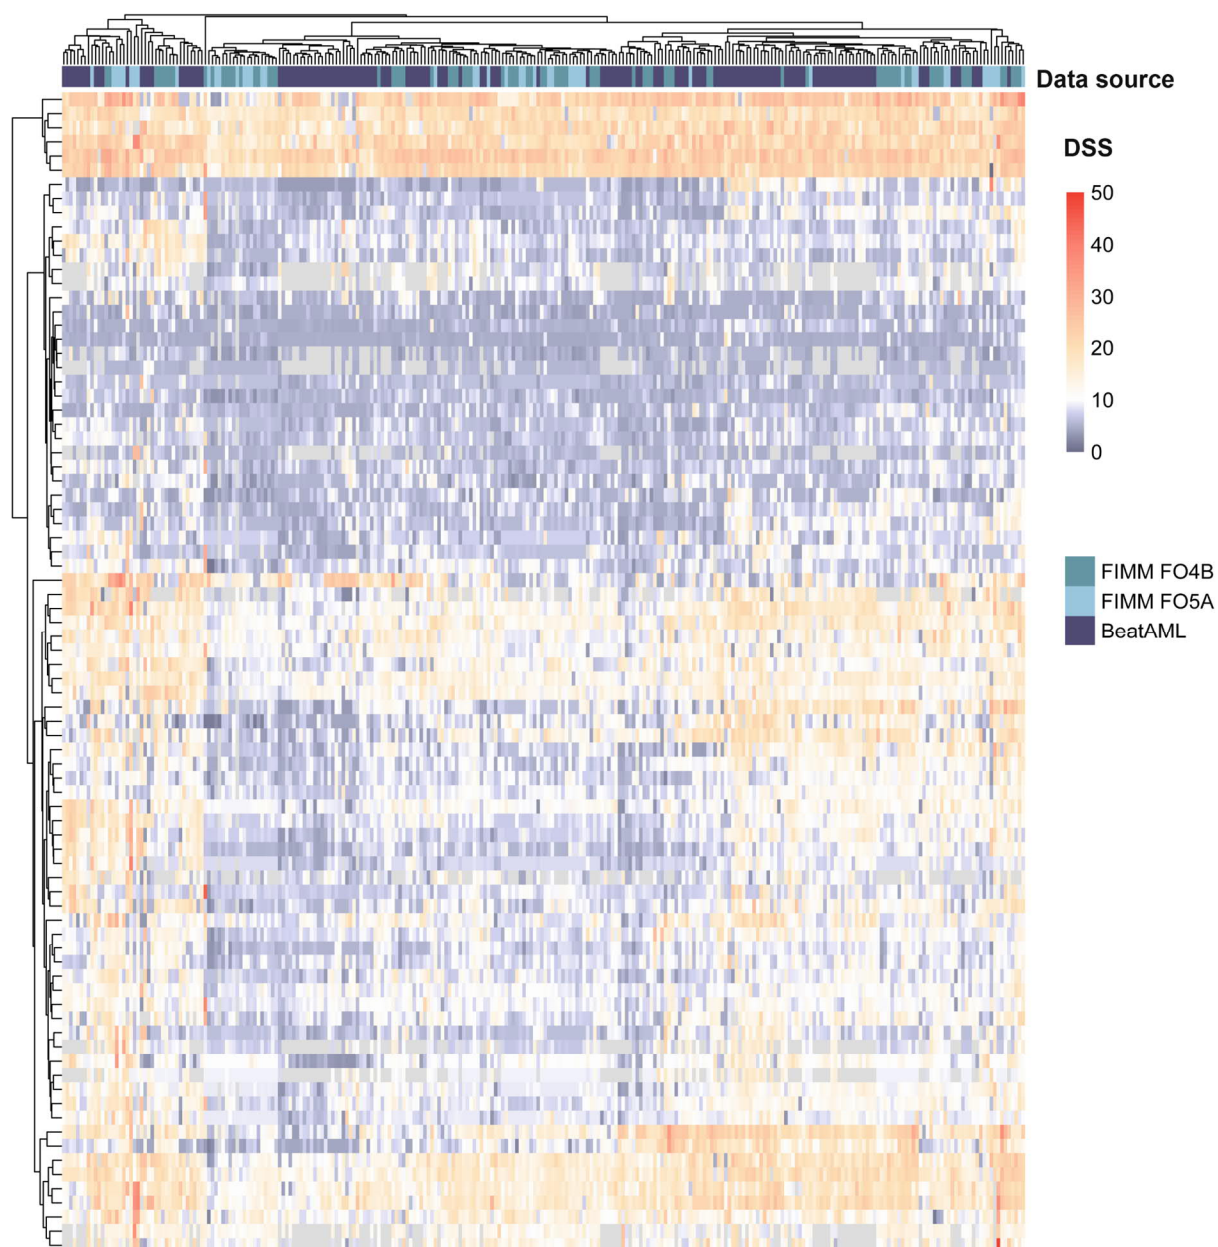

**Supplementary Figure 3** | Integrated heatmap of ComBat-corrected DSS responses for the BeatAML and FIMM-AML cohorts. Columns correspond to 272 patients (147 from BeatAML and 125 from FIMM-AML; n=79 for FO4B compound collection; n=46 for FO5A collection), and rows are 82 overlapping drugs. Batch effects from the two data sources were adjusted with the non-parametric empirical Bayes method. The ComBat-corrected DSS values were re-scaled to the range of the original DSS values (from 0 to 50).

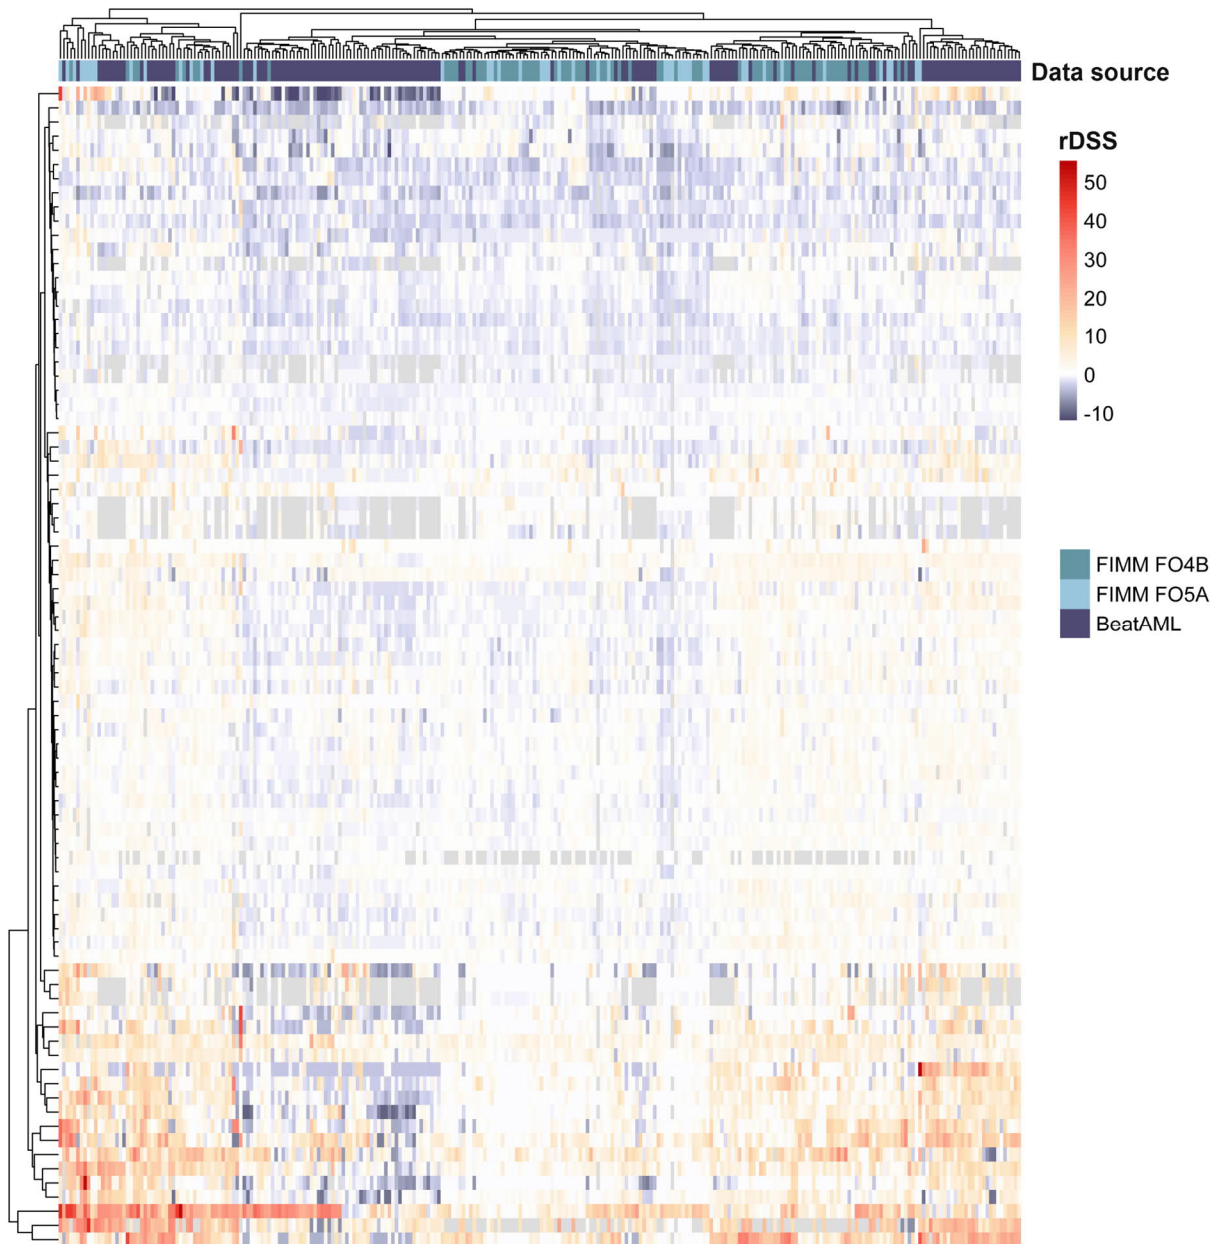

**Supplementary Figure 4** | Integrated heatmap of ComBat-corrected rDSS drug response profiles for the BeatAML and FIMM-AML cohorts. Columns correspond to 272 patients (147 from BeatAML and 125 from FIMM-AML; n=79 for FO4B compound collection; n=46 for FO5A collection), where the selective rDSS normalization was done against the FIMM healthy control samples (n = 10, FO5A compound collection). Rows are 82 overlapping drugs. See **Figure 6** for a version where the drug names are listed.
